# Supplementary material
Source: PubMed Central journal article supplement (PMC407830)
Supplement: nar_32_7_2214__5.pdf [file nar_32_7_2214__5.pdf]

| Table 4S. Nucleic acid backbone torsion angles obtained from the Chro-DNA complexes I (CPXI) |        |         |               |         |          |          |            |         |         |        |
|----------------------------------------------------------------------------------------------|--------|---------|---------------|---------|----------|----------|------------|---------|---------|--------|
| Chain ID                                                                                     | Number | Residue | $\alpha$      | $\beta$ | $\gamma$ | $\delta$ | $\epsilon$ | $\zeta$ | $x$     | $p$    |
| A                                                                                            | 1      | T       | -63.1         | -165.17 | -1.73    | 123.49   | -159.43    | -75.41  | -153.2  | 40.56  |
| A                                                                                            | 2      | T       | -54.31        | -178.32 | 33.59    | 106.23   | -164.71    | -78.01  | -136.65 | 63.06  |
| A                                                                                            | 3      | G       | 143.72        | -153.51 | 41.79    | 126.34   | -179.47    | -109.34 | -131.93 | 131.51 |
| A                                                                                            | 4      | G       | -58.32        | -163.63 | -167.38  | 103.95   | -164.1     | -84.33  | -176.7  | 91.39  |
| A                                                                                            | 5      | C       | -53.46        | -169.6  | 41.91    | 114.83   | -179.74    | -92.62  | -149.31 | 99.32  |
| A                                                                                            | 6      | C       | -64.87        | -164.42 | 48.32    | 120.73   | -168.79    | -97.45  | -144.45 | 126.32 |
| A                                                                                            | 7      | A       | -71.16        | -171.02 | 52.33    | 151.61   | -172.84    | -104.55 | -110.29 | 182.76 |
| A                                                                                            | 8      | A       | v. $\alpha$ . | n.a.    | 43.45    | 145.78   | n.a.       | n.a.    | -94.01  | 158.09 |
| B                                                                                            | 9      | T       | -59.6         | -169.34 | 47.27    | 125.86   | 179.79     | -89.01  | -129.25 | 129.3  |
| B                                                                                            | 10     | T       | -55.73        | 173.69  | 38.67    | 137.74   | -172.35    | -106.52 | -119.93 | 137.36 |
| B                                                                                            | 11     | G       | 121.5         | -152.14 | 37.72    | 105.13   | -165.93    | -98.16  | -142.88 | 75.09  |
| B                                                                                            | 12     | G       | -55.42        | -166.42 | -147.75  | 95.47    | -158.15    | -68.18  | -172.82 | 48.95  |
| B                                                                                            | 13     | C       | -60.25        | 179.55  | 36.02    | 101.54   | -173.68    | -87.19  | -160.74 | 48.77  |
| B                                                                                            | 14     | C       | -65.39        | -174.4  | 61.73    | 98.53    | -159.11    | -82.38  | -154.22 | 34.78  |
| B                                                                                            | 15     | A       | -79.22        | -164.16 | 58.79    | 141.77   | -177.02    | -91.15  | -119.47 | 163.87 |
| B                                                                                            | 16     | A       | n.a.          | n.a.    | 47.61    | 144.68   | n.a.       | n.a.    | -100.74 | 163.85 |
